# Supplementary material for: Deaths in triathletes: immersion pulmonary oedema as a possible cause
Source: PubMed Central journal article supplement — BMJ Open Sport Exerc Med. 2016 Aug 29;2(1):e000146. doi: 10.1136/bmjsem-2016-000146 (PMC5117085; doi:10.1136/bmjsem-2016-000146), 2016-08-29
Supplement: bmjsem-2016-000146supp.pdf [file bmjsem-2016-000146supp.pdf]

Online Supplement

| Case # | Time Event to Death (d) | Age (y) | Sex | Race | Ht (m) | Wt (kg) | BMI (kg/m <sup>2</sup> ) | Heart Wt (g) | CAD | Myocardial Thickness (mm) |    |        | Cardiac Findings                                                                                                                                          | Medical Examiners Notes and Reported Cause of Death                                                                    | Notes                                                                                                                                                       |
|--------|-------------------------|---------|-----|------|--------|---------|--------------------------|--------------|-----|---------------------------|----|--------|-----------------------------------------------------------------------------------------------------------------------------------------------------------|------------------------------------------------------------------------------------------------------------------------|-------------------------------------------------------------------------------------------------------------------------------------------------------------|
|        |                         |         |     |      |        |         |                          |              |     | RV                        | LV | Septum |                                                                                                                                                           |                                                                                                                        |                                                                                                                                                             |
| 1      | 0                       | 33      | M   | W    | 1.93   | 142.5   | 38.2                     | 530          | Yes | 5                         |    |        | 80% stenosis mid-LAD; no myocardial focal lesions. LV chamber diameter 5 cm.                                                                              | Drowning, cardiomegaly with LVH.                                                                                       | Approximately 45 kg weight loss during training                                                                                                             |
| 2      | 0                       | 43      | F   | W    | 1.65   | 84.8    | 31.1                     | 470          | No  |                           | 17 |        | LVH. Normal coronary anatomy. Up to 10% focal eccentric luminal narrowing of RCA. Focal microfiber disarray and fibrosis in RV.                           | Drowning, hypertensive heart disease                                                                                   | She was observed swimming slowly near the park and stopped to hold on to a buoy. She then started doing the backstroke. Another swimmer heard her wheezing. |
| 3      | 3                       | 38      | F   | W    | 1.80   | 51.7    | 15.9                     | 311          | No  | 3                         | 10 | 9      | No CAD. Contraction band necrosis and individual myocytolysis with associated inflammation. Acute myocarditis. Thickening and lobulation of mitral valve. | Anoxic brain injury due to near drowning.                                                                              |                                                                                                                                                             |
| 4      | 0                       | 66      | M   | W    |        |         |                          |              |     |                           |    |        |                                                                                                                                                           | Acute dissection of descending aorta                                                                                   |                                                                                                                                                             |
| 5      | 0                       | 42      | M   | W    | 1.79   | 82.1    | 25.6                     | 440          | No  |                           |    |        | No CAD. No fibrosis.                                                                                                                                      | Asphyxiation due to drowning. AF listed as a possible contributing factor; cardiomegaly. Urine positive for flecainide |                                                                                                                                                             |
| 6      | 0                       | 57      | M   | W    | 1.83   | 78.5    | 23.5                     | 430          | No  |                           | 10 |        | Dilation of both ventricles. Focal atherosclerotic stenosis of LAD (up to 50-60%)                                                                         | Drowning in setting of presumed cardiac event. Dilated cardiomyopathy of unknown etiology.                             |                                                                                                                                                             |
| 7      | 0                       | 40      | F   | W    | 1.68   | 77.6    | 27.6                     | 310          | No  | 2                         | 11 | 8      | 25% stenosis of LAD. Myxomatous degeneration of zona fibrosa (mitral valve prolapse).                                                                     | Cardiac arrhythmia due to myxomatous degeneration of mitral valve (mitral valve prolapse)                              |                                                                                                                                                             |
| 8      | 0                       | 64      | M   | W    | 1.80   | 105.3   | 32.4                     | 430          | No  | 3                         | 12 |        | Up to 10% stenosis of LAD.                                                                                                                                | Atherosclerotic CV disease.                                                                                            |                                                                                                                                                             |
| 9      | 0                       | 58      | M   | W    | 1.78   | 90.7    | 28.7                     | 470          | No  | 8                         | 26 | 26     | Small atheroma of LAD, otherwise no CAD.                                                                                                                  | Massive retroperitoneal hemorrhage due to renal artery dissection/rupture                                              |                                                                                                                                                             |

| Case # | Time Event to Death (d) | Age (y) | Sex | Race | Ht (m) | Wt (kg) | BMI (kg/m <sup>2</sup> ) | Heart Wt (g) | CAD | Myocardial Thickness (mm) |       |        | Cardiac Findings                                                                                                                                                                                                                                                                                                                                                                                                                                                                                                                                                                                                                                                                                        | Medical Examiners Notes and Reported Cause of Death                                    | Notes                                                                                                                                                                                                           |
|--------|-------------------------|---------|-----|------|--------|---------|--------------------------|--------------|-----|---------------------------|-------|--------|---------------------------------------------------------------------------------------------------------------------------------------------------------------------------------------------------------------------------------------------------------------------------------------------------------------------------------------------------------------------------------------------------------------------------------------------------------------------------------------------------------------------------------------------------------------------------------------------------------------------------------------------------------------------------------------------------------|----------------------------------------------------------------------------------------|-----------------------------------------------------------------------------------------------------------------------------------------------------------------------------------------------------------------|
|        |                         |         |     |      |        |         |                          |              |     | RV                        | LV    | Septum |                                                                                                                                                                                                                                                                                                                                                                                                                                                                                                                                                                                                                                                                                                         |                                                                                        |                                                                                                                                                                                                                 |
| 10     | 0                       | 46      | M   | W    | 1.80   | 104.4   | 32.1                     | 520          | No  | 4                         | 17    | 20     | Two areas of fibrosis of postero-lateral LV wall, chronic inflammation and extracellular pigment and pigmented macrophages (siderophages) indicative of remote infarction and hemorrhage.                                                                                                                                                                                                                                                                                                                                                                                                                                                                                                               | Hypertensive cardiovascular disease, complicated by drowning. History of hypertension. | Found by another swimmer bobbing in water. He stated: <i>"It seemed able to vocalize but not verbalize - it seemed as though he was breathing and able to grunt, but he was unable to actually form words."</i> |
| 11     | 1                       | 46      | M   | W    | 1.73   | 77.6    | 26.0                     | 450          | No  |                           | 12    | 22     | No CAD                                                                                                                                                                                                                                                                                                                                                                                                                                                                                                                                                                                                                                                                                                  | Asphyxia by submersion. Mild cardiomegaly.                                             |                                                                                                                                                                                                                 |
| 12     | 0                       | 43      | M   | W    | 1.73   | 69.7    | 23.4                     | 290          | No  | 3                         | 13    | 13     | RV chamber diameter 5.5 cm, LV 4.4 cm, transventricular 4.3 cm. RV: scattered subtotal intramural adipose without necrosis, degeneration, fibrosis or inflammation. Adjacent ventricular septum with focal loose interstitial fibrous tissue.                                                                                                                                                                                                                                                                                                                                                                                                                                                           | Drowning.                                                                              |                                                                                                                                                                                                                 |
| 13     | 0                       | 42      | M   | W    |        |         |                          | 410          | Yes | 2.5-4                     | 10-12 |        | LV mildly dilated, diameter 4.2 cm at level of papillary muscles. Coronary anatomy normal. 60-70% soft, tan plaque to the proximal portion of LAD (approx. 1 cm distal to origin of L circumflex), with small amount of plaque hemorrhage present, and a soft, red thrombosis to its surface. Thrombosis not adherent to the surface of the plaque. Some minor calcific atherosclerosis to the proximal L circumflex and L main, with an area of tan atherosclerosis to the proximal LAD (proximal to the 60-70% stenosis), <50% in degree. Myocardium has a few small areas of focal white fibrosis to the LV, notably posterior LV and posterior septum. No areas of pallor, softening or hemorrhage. | Sudden cardiac death due to CAD.                                                       |                                                                                                                                                                                                                 |

| Case # | Time Event to Death (d) | Age (y) | Sex | Race | Ht (m) | Wt (kg) | BMI (kg/m <sup>2</sup> ) | Heart Wt (g) | CAD | Myocardial Thickness (mm) |    |        | Cardiac Findings                                                                                                                                                                                                                                                                      | Medical Examiners Notes and Reported Cause of Death                                                                                                           | Notes                                                                                                                |
|--------|-------------------------|---------|-----|------|--------|---------|--------------------------|--------------|-----|---------------------------|----|--------|---------------------------------------------------------------------------------------------------------------------------------------------------------------------------------------------------------------------------------------------------------------------------------------|---------------------------------------------------------------------------------------------------------------------------------------------------------------|----------------------------------------------------------------------------------------------------------------------|
|        |                         |         |     |      |        |         |                          |              |     | RV                        | LV | Septum |                                                                                                                                                                                                                                                                                       |                                                                                                                                                               |                                                                                                                      |
| 14     | 2                       | 44      | M   | W    | 1.80   | 85.8    | 26.4                     | 400          | No  |                           |    |        | RCA: <20% stenosis. Occasional hypertrophic myocytes.                                                                                                                                                                                                                                 | Death attributed to hypoxic encephalopathy with cerebral oedema. Post event evidence of prolonged Q-Tc. Said to be in VF when found. Died 2 days after event. |                                                                                                                      |
| 15     | 0                       | 45      | M   | B    | 1.73   | 74.4    | 24.9                     | 400          | No  |                           |    |        | No CAD                                                                                                                                                                                                                                                                                | Drowning                                                                                                                                                      |                                                                                                                      |
| 16     | 0                       | 51      | M   | W    | 1.83   | 127.9   | 38.3                     | 630          | No  | 6                         | 25 |        | No CAD                                                                                                                                                                                                                                                                                | Drowning                                                                                                                                                      | History of hypertension.                                                                                             |
| 17     | 0                       | 46      | M   | W    | 1.80   | 99.8    | 30.7                     | 540          | Yes | 3                         | 30 | 20     | LAD: up to 70% luminal stenosis 2.5 cm from origin. RCA, L main and L circumflex normal. Mild thickening of mitral and tricuspid valves.                                                                                                                                              | Lethal cardiac arrhythmia, complications of atherosclerotic CV disease with water immersion.                                                                  | Previously healthy, several prior triathlons. He was stated to be at least 1/2 mile into the swim when he was found. |
| 18     | 0                       | 48      | M   | W    | 1.83   | 112.5   | 33.6                     | 540          | No  | 4                         | 10 | 10     | Heart markedly dilated; 20% segmental narrowing of proximal LAD. Histology of myocardium unremarkable. Elsewhere in report, stated maximal 50-60% segmental narrowing, not thought to contribute to death due to lack of critical stenosis and lack of ischemic changes in myocardium | Idiopathic dilated cardiomyopathy.                                                                                                                            | Collapsed on the beach after exiting the water at the end of the swim portion.                                       |
| 19     | 0                       | 53      | M   | W    | 1.77   | 77.1    | 24.8                     | 428          | No  | 4                         | 15 | 13     | No CAD                                                                                                                                                                                                                                                                                | Freshwater drowning                                                                                                                                           |                                                                                                                      |
| 20     | 0                       | 57      | M   | W    | 1.83   | 101.6   | 30.4                     | 450          | Yes |                           |    |        | LAD 70% RCA 70% proximal, 50% distal, circumflex-slight atherosclerosis. One slide had hemorrhage within a plaque, judged to be several days old due to macrophages, early granulation tissue and a few neutrophils                                                                   | Atherosclerotic CV disease with narrowing of coronary arteries                                                                                                |                                                                                                                      |
| 21     | 0                       | 64      | M   | W    | 1.70   | 81.2    | 28.0                     | 440          | No  |                           |    |        | RCA-10% stenosis LAD-20% stenosis L circumflex 10% stenosis                                                                                                                                                                                                                           | Drowning, hypertensive CV disease                                                                                                                             |                                                                                                                      |
| 22     | 0                       | 68      | M   | W    |        |         |                          |              | Yes |                           |    |        |                                                                                                                                                                                                                                                                                       | No autopsy, history of cardiac stents. Presumed cause of death CAD                                                                                            |                                                                                                                      |

| Case # | Time Event to Death (d) | Age (y) | Sex | Race | Ht (m) | Wt (kg) | BMI (kg/m <sup>2</sup> ) | Heart Wt (g) | CAD | Myocardial Thickness (mm) |    |        | Cardiac Findings        | Medical Examiners Notes and Reported Cause of Death | Notes                                                         |
|--------|-------------------------|---------|-----|------|--------|---------|--------------------------|--------------|-----|---------------------------|----|--------|-------------------------|-----------------------------------------------------|---------------------------------------------------------------|
|        |                         |         |     |      |        |         |                          |              |     | RV                        | LV | Septum |                         |                                                     |                                                               |
| 23     | 0                       | 44      | F   | B    | 1.63   | 199.6   | 75.5                     | 510          | No  |                           |    |        | Minimal atherosclerosis |                                                     | Noted to be struggling near end of swim. Brother died of CHF. |

**Abbreviations:** **W** (white); **B** (black); **Ht** (height); **Wt** (Weight); **BMI** (body mass index); **RV** (right ventricle); **LV** (left ventricle); **CAD** (coronary artery disease); **CHF** (congestive heart failure); **LAD** (left anterior descending coronary artery); **RCA** (right coronary artery); **CV** (cardiovascular); **ACLS** (advanced cardiac life support); **VF** (ventricular fibrillation)
